# Supplementary material for: Prognostic Implications of Epilepsy Onset Age According to Relapse Pattern in Patients with Four-Year Remission
Source: MDPI journal article supplement (doi:10.3390/diagnostics10121089), 2020-12-14
Supplement: s1 [file s1]

**Table 1.** Demographic data regarding the duration of remission according to relapse pattern in the age at onset before age 30.

| Age of onset group,<br>n, (%) <sup>a</sup>                                 | Under 10 years old,<br>n = 43 (9.1) |                 |                 |     | 10-19 years old,<br>n = 192 (40.7) |                 |                 |     | 20-29 years old,<br>n = 85 (18.0) |                 |                 |     |
|----------------------------------------------------------------------------|-------------------------------------|-----------------|-----------------|-----|------------------------------------|-----------------|-----------------|-----|-----------------------------------|-----------------|-----------------|-----|
|                                                                            | Relapse pattern                     | SF              | LR              | ER  | P-value <sup>b</sup>               | SF              | LR              | ER  | P-value <sup>b</sup>              | SF              | LR              | ER  |
| n (%)                                                                      | 14 (32.6)                           | 12 (27.9)       | 17 (39.5)       |     | 62 (32.3)                          | 77 (40.1)       | 53 (27.6)       |     | 22 (25.9)                         | 39 (45.9)       | 24 (28.2)       |     |
| Mean duration of the total seizure-free period ±SD, m                      | 87.21<br>±34.98                     | 74.25<br>±16.58 | 69.41<br>±15.87 | N-C | 76.35<br>±25.57                    | 71.09<br>±24.00 | 70.30<br>±24.91 | N-C | 75.00<br>±26.23                   | 69.77<br>±26.01 | 71.00<br>±20.81 | N-C |
| Mean duration from last seizure to the initiation of AED withdrawal ±SD, m | 72.79<br>±31.59                     | 55.58<br>±15.14 | 55.94<br>±13.91 | N-C | 60.52<br>±22.10                    | 56.10<br>±21.33 | 58.21<br>±22.35 | N-C | 59.05<br>±24.99                   | 55.59<br>±20.47 | 55.63<br>±17.90 | N-C |
| Mean duration of the AED withdrawal process ±SD, m                         | 14.33<br>±8.07                      | 18.67<br>±10.86 | 13.47<br>±6.92  | N-C | 15.84<br>±10.03                    | 15.23<br>±8.35  | 12.09<br>±8.37  | N-C | 15.95<br>±9.44                    | 15.46<br>±7.48  | 14.96<br>±11.78 | N-C |

SF, seizure-free; LR, late relapse; ER, early relapse; m, month; AED, antiepileptic drug. a: The proportion of all patients in each 10-year age group b: No significant differences in the mean duration among the subgroups stratified by relapse pattern across onset age groups.

**Table 2.** Demographic data of the duration to remission according to relapse pattern in the age at onset of 30 years old or older.

| 9                                                                          | 30-39 years old,<br>n = 53 (11.2) |                 |                 |     | 40-49 years old,<br>n = 55 (11.7) |                 |                 |     | 50 years old or older,<br>n = 44 (9.3) |                 |                 |     |
|----------------------------------------------------------------------------|-----------------------------------|-----------------|-----------------|-----|-----------------------------------|-----------------|-----------------|-----|----------------------------------------|-----------------|-----------------|-----|
|                                                                            | Relapse pattern                   | SF              | LR              | ER  | P-value <sup>b</sup>              | SF              | LR              | ER  | P-value <sup>b</sup>                   | SF              | LR              | ER  |
| n (%)                                                                      | 19 (35.8)                         | 21 (39.6)       | 13 (24.5)       |     | 30 (54.5)                         | 19 (34.5)       | 6 (10.9)        |     | 26 (59.3)                              | 14 (33.3)       | 4 (7.4)         |     |
| Mean duration of the total seizure-free period ±SD, m                      | 65.53<br>±12.53                   | 74.95<br>±25.76 | 72.23<br>±23.46 | N-C | 80.73<br>±27.65                   | 69.16<br>±15.46 | 74.50<br>±16.77 | N-C | 77.77<br>±24.00                        | 74.14<br>±28.16 | 61.50<br>±8.74  | N-C |
| Mean duration from last seizure to the initiation of AED withdrawal ±SD, m | 49.05<br>±8.90                    | 58.24<br>±23.55 | 56.23<br>±21.19 | N-C | 63.63<br>±26.87                   | 53.00<br>±12.22 | 58.33<br>±19.81 | N-C | 57.88<br>±16.51                        | 62.57<br>±28.35 | 51.50<br>±12.79 | N-C |
| Mean duration of the AED withdrawal process ±SD, m                         | 16.47<br>±7.76                    | 16.71<br>±10.31 | 16.08<br>±11.35 | N-C | 17.77<br>±10.07                   | 16.16<br>±6.06  | 16.17<br>±7.94  | N-C | 19.88<br>±11.81                        | 11.57<br>±5.80  | 9.50<br>±4.93   | N-C |

SF, seizure-free; LR, late relapse; ER, early relapse; m, month; AED, antiepileptic drug. a: The proportion of all patients in each 10-year age group. b: No significant differences in the mean duration among the subgroups stratified by relapse pattern across onset age groups.
